# Supplementary material
Source: PubMed Central journal article supplement (PMC4679431)
Supplement: NIHMS736199-supplement-2.pdf [file NIHMS736199-supplement-2.pdf]

## Supplementary Table

Table S1. Analysis of chondrocyte shape in the center of the ceratohyal element.

|                 | Mean LWR | Standard Deviation | P value |
|-----------------|----------|--------------------|---------|
| WT              | 4.107    | 0.717              | 0.5279  |
| <i>wnt11</i>    | 4.096    | 0.6098             | 0.3577  |
| <i>scribble</i> | 4.063    | 0.7509             | 0.6213  |
| <i>vangl2</i>   | 3.497    | 0.9039             | 0.1901  |
| <i>wnt5b</i>    | 1.650    | 0.4876             | 0.0059  |
| <i>gpc4</i>     | 1.644    | 0.5072             | 0.0259  |

  

|                             | Mann-Whitney U | Difference between Means | P value  |
|-----------------------------|----------------|--------------------------|----------|
| WT vs <i>vangl2</i>         | 447.5          | 0.760                    | 0.0006   |
| WT vs <i>wnt5b</i>          | 6.5            | 2.550                    | < 0.0001 |
| WT vs <i>gpc4</i>           | 6.0            | 2.520                    | < 0.0001 |
| <i>gpc4</i> vs <i>wnt5b</i> | 789            | 0.030                    | 0.9181   |

Length and width of 40 cells of 4 ceratohyal elements were measured and analysed for each genotype as described in the Methods section. Abbreviations: LWR = length to width ratio, WT = wild type
