# Supplementary material
Source: PubMed Central journal article supplement (PMC4679431)

Sup. Fig. 1

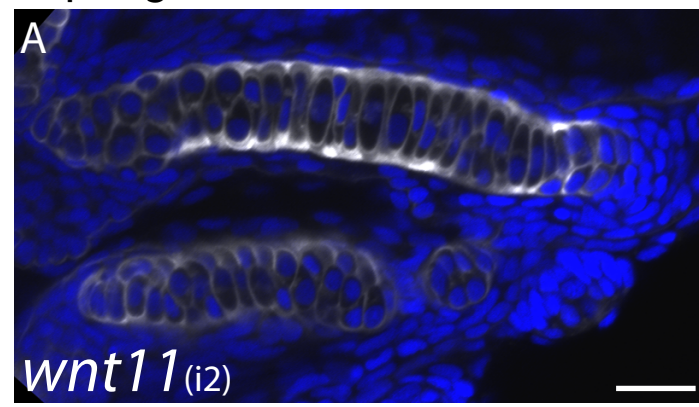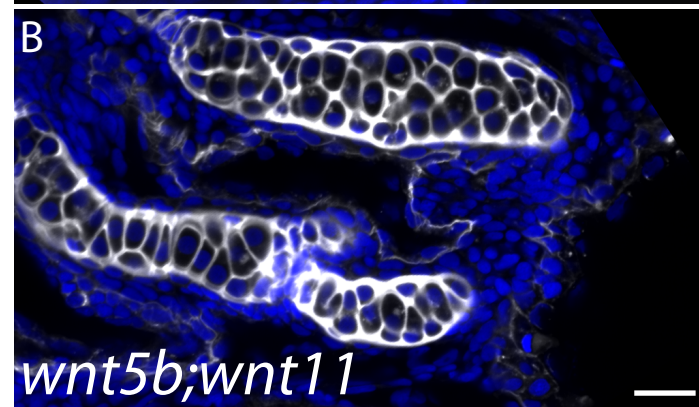

Supplement: NIHMS736199-supplement-1.pdf [file NIHMS736199-supplement-1.pdf]
